# Supplementary material for: Mutation of neuron-specific chromatin remodeling subunit BAF53b: rescue of plasticity and memory by manipulating actin remodeling
Source: PubMed Central journal article supplement — Learn Mem. 2017 May;24(5):199–209. doi: 10.1101/lm.044602.116 (PMC5397687; doi:10.1101/lm.044602.116), 2017-05
Supplement: supp_24.5.199_Supplemental_Material.pdf [file supp_24.5.199_Supplemental_Material.pdf]

## Supplemental Materials

Mutation of neuron-specific chromatin remodeling subunit BAF53b: Rescue of plasticity and memory by manipulating actin remodeling.

Annie Vogel Ciernia<sup>1</sup>, Enikő A Kramár<sup>2,3</sup>, Dina P Matheos<sup>2,3</sup>, Robbert Havekes<sup>4</sup>, Thekla J Hemstedt<sup>2,3</sup>, Christophe N. Magnan<sup>5,6</sup>, Keith Sakata<sup>2,3</sup>, Ashley Tran<sup>2,3</sup>, Soraya Azzawi<sup>2,3</sup>, Alberto Lopez<sup>2,3</sup>, Richard Dang<sup>2,3</sup>, Weisheng Wang<sup>5,6</sup>, Brian Trieu<sup>7,8</sup>, Joyce Tong<sup>2,3</sup>, Ruth M Barrett<sup>9</sup>, Rebecca J Post<sup>2,3</sup>, Pierre Baldi<sup>5,6</sup>, Ted Abel<sup>10</sup>, Gary Lynch<sup>8</sup> & Marcelo A Wood<sup>2,3,6\*</sup>

1 Department of Medical Microbiology and Immunology, University of California, Davis, California, USA.

2 Department of Neurobiology and Behavior, University of California, Irvine, California, USA.

3 Center for the Neurobiology of Learning and Memory, Irvine, California, USA.

4 Groningen Institute for Evolutionary Life Sciences (GELIFES), University of Groningen, Groningen, The Netherlands.

5 Department of Computer Science, University of California, Irvine, California, USA.

6 Institute for Genomics and Bioinformatics, University of California, Irvine, California, USA.

7 Department of Anatomy and Neurobiology, University of California, Irvine, California, USA.

8 Department of Psychiatry and Human Behavior, University of California, Irvine, California, USA.

9 Oregon Health and Science University, Portland, Oregon, USA.

10 Departments of Molecular Physiology and Biophysics, Psychiatry, and Biochemistry, Iowa Neuroscience Institute, Iowa City, Iowa, USA

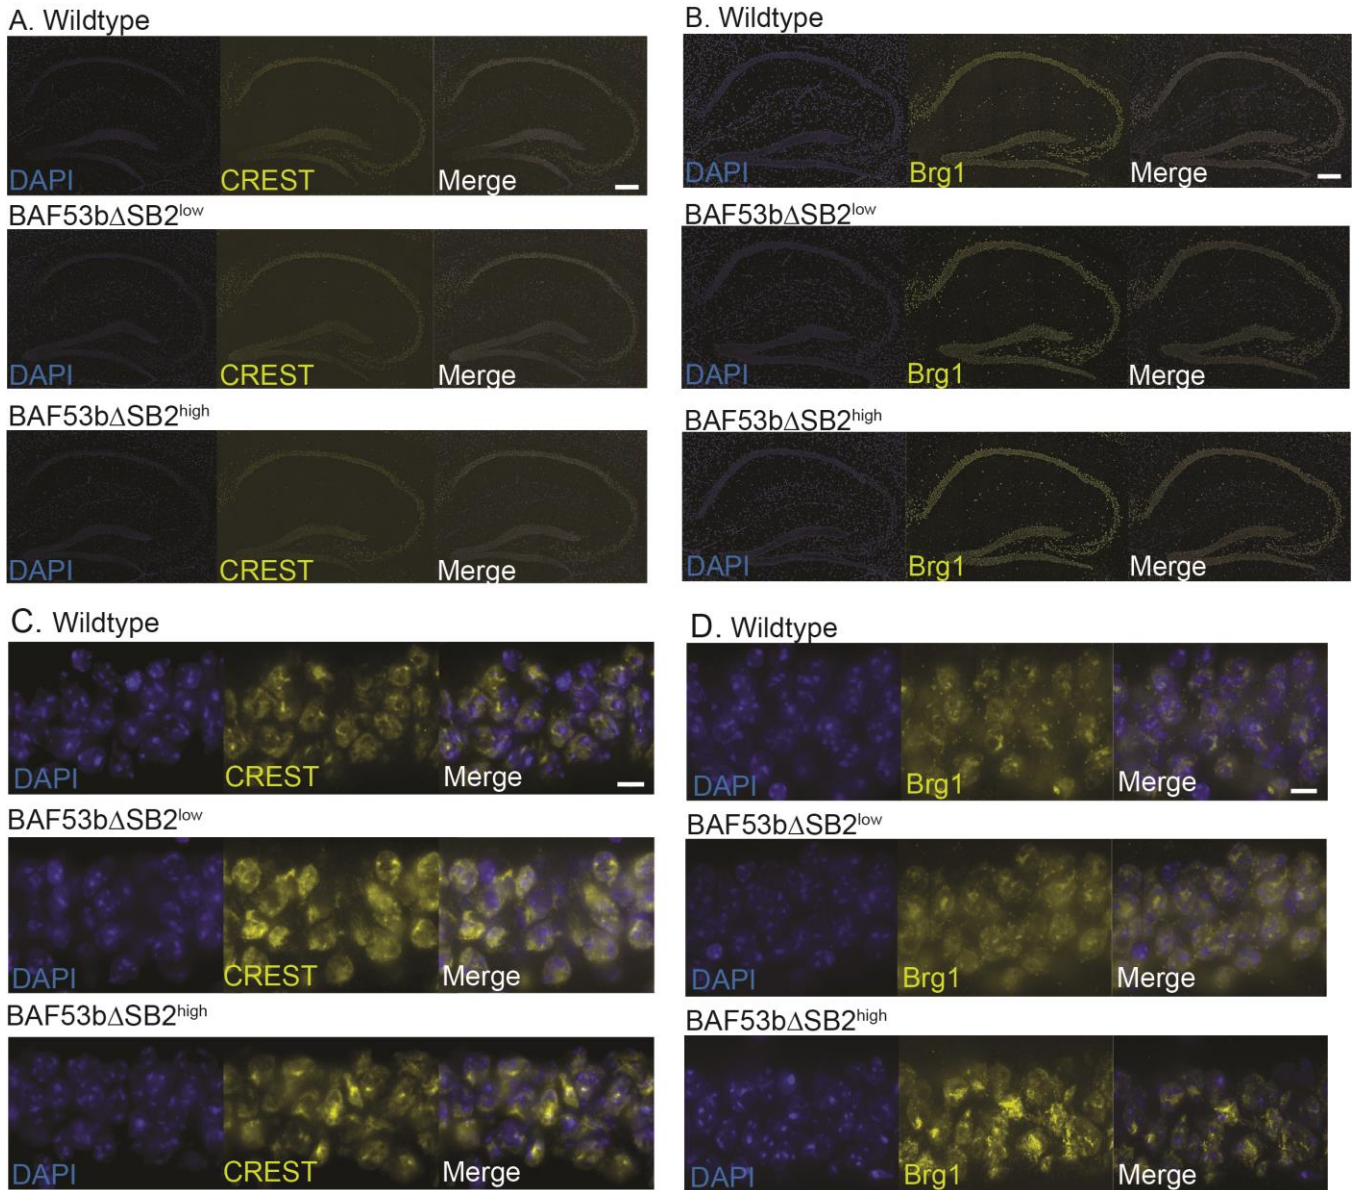

**Figure S1. nBAF subunit expression in dorsal hippocampus in wildtype,  $BAF53b\Delta SB2^{low}$ , and  $BAF53b\Delta SB2^{high}$  mice.**

(A) Brg1 is expressed throughout dorsal hippocampus in wildtype,  $BAF53b\Delta SB2^{low}$ , and  $BAF53b\Delta SB2^{high}$  mice. Sagittal sections (20um) were taken from animals from each genotype, stained for Brg1 and DAPI (nuclear marker) as described in the methods section. 20x scans were taken of dorsal hippocampus. Scale bar is 200um. (B) CREST is expressed throughout dorsal hippocampus in wildtype,  $BAF53b\Delta SB2^{low}$ , and  $BAF53b\Delta SB2^{high}$  mice. Images acquired as in (A). Scale bar is 200um. (C) Brg1 nuclear expression colocalizes with nuclear marker DAPI in CA1 of wildtype,  $BAF53b\Delta SB2^{low}$ , and  $BAF53b\Delta SB2^{high}$  mice. Sagittal sections (20um) were taken from animals from each genotype, stained for Brg1 and DAPI (nuclear marker). 63x confocal images stacks acquired in CA1 were max intensity projected using Image J. Scale bar is 10um. (D) CREST expression colocalizes with nuclei marker DAPI in CA1 of wildtype,  $BAF53b\Delta SB2^{low}$ , and  $BAF53b\Delta SB2^{high}$  mice. Images were prepared as in (C). Scale bar is 10um.

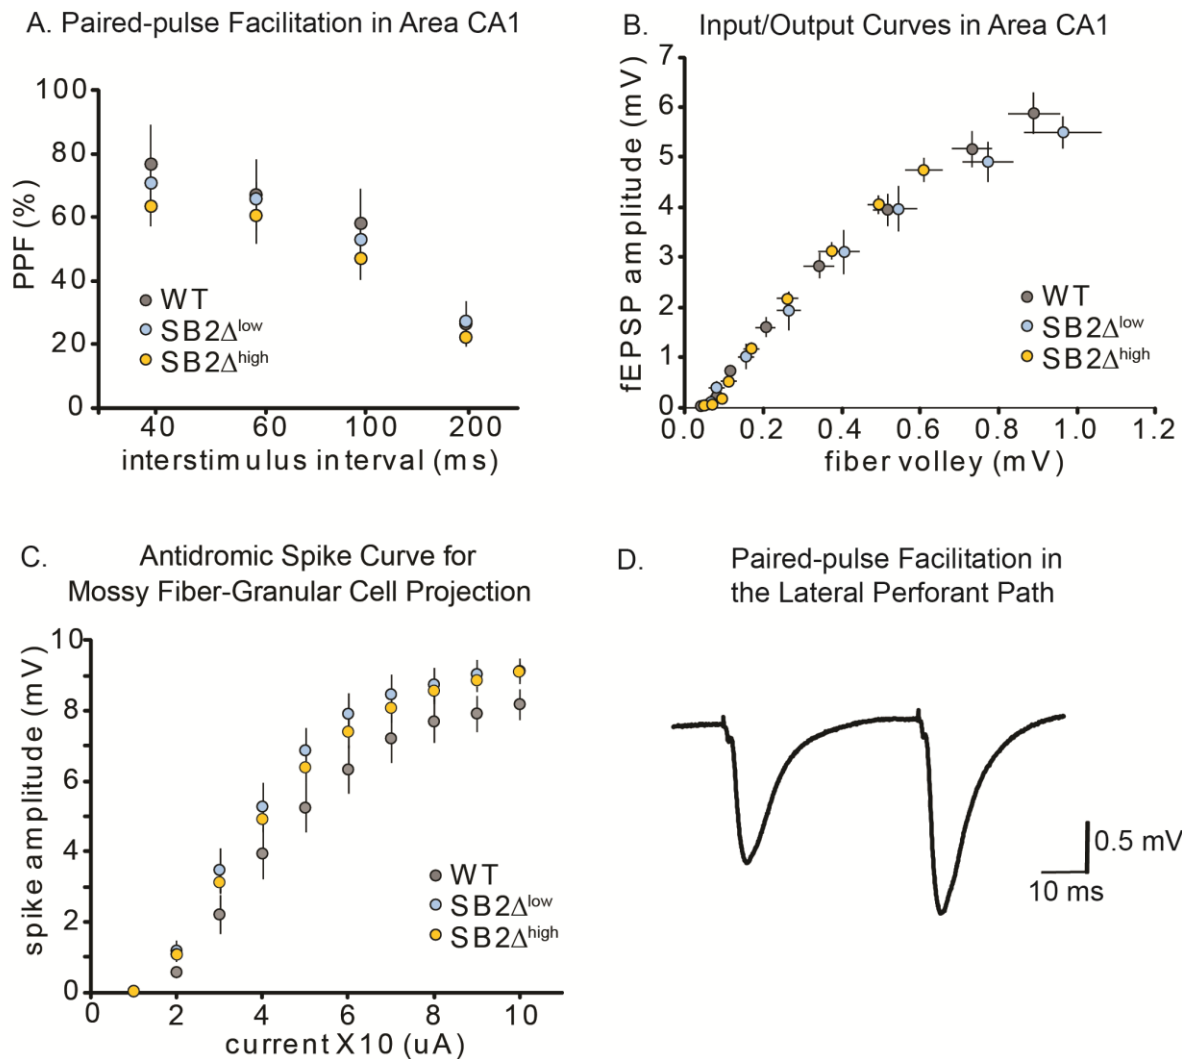

**Figure S2. Baseline electrophysiology in slices from BAF53b $\Delta$ SB2<sup>low</sup> and BAF53b $\Delta$ SB2<sup>high</sup> mice.** (A) Paired-pulse facilitation of the initial slope of the synaptic response in hippocampal CA1 (40, 60, 100, and 200 ms inter-pulse intervals) was not significantly difference between groups in slices from BAF53b $\Delta$ SB2<sup>low</sup>, BAF53b $\Delta$ SB2<sup>high</sup> and WT mice (2-way RM-ANOVA, no main effect of genotype  $F_{2,48}=0.32$ ,  $p=0.73$ , a significant main effect of inter-pulse interval  $F_{3,48}=135.5$ ,  $p<0.0001$ , but no significant interaction  $F_{6,48}=0.58$ ,  $p=0.75$ ).  $n=7$  slices from  $>4$  animals per genotype. (B) Input/Output curves compare amplitudes of the presynaptic fiber volley to the fEPSP amplitude across a range of stimulation currents in hippocampal CA1. Input/output curves were not measurable different between BAF53b $\Delta$ SB2<sup>low</sup>, BAF53b $\Delta$ SB2<sup>high</sup> and WT mice (1-way ANOVA on slope of curve,  $F_2=1.50$ ,  $p=0.25$ ).  $n=7-8$  slices from  $>4$  animals per genotype. (C) Input/output curve measuring the amplitude of the cell spike in the granular cell layer generated by antidromic stimulation of mossy fiber projections across a range of currents showed no significant difference between BAF53b $\Delta$ SB2<sup>low</sup>, BAF53b $\Delta$ SB2<sup>high</sup> and WT mice (2-way RM-ANOVA no main effect of genotype  $F_{2,288}=2.09$ ,  $p=0.14$ , a main effect of stimulation  $F_{9,288}=357.7$ ,  $p<0.0001$ , no significant interaction  $F_{18,288}=0.74$ ,  $p=0.77$ ).  $n=11-12$  slices from 3-4 animals per genotype. (D) Representative trace of characteristic paired-pulse facilitation recorded in the lateral perforant path of a wildtype slice during the delivery of a pair of stimuli (40 ms interval) near the hippocampal fissure.

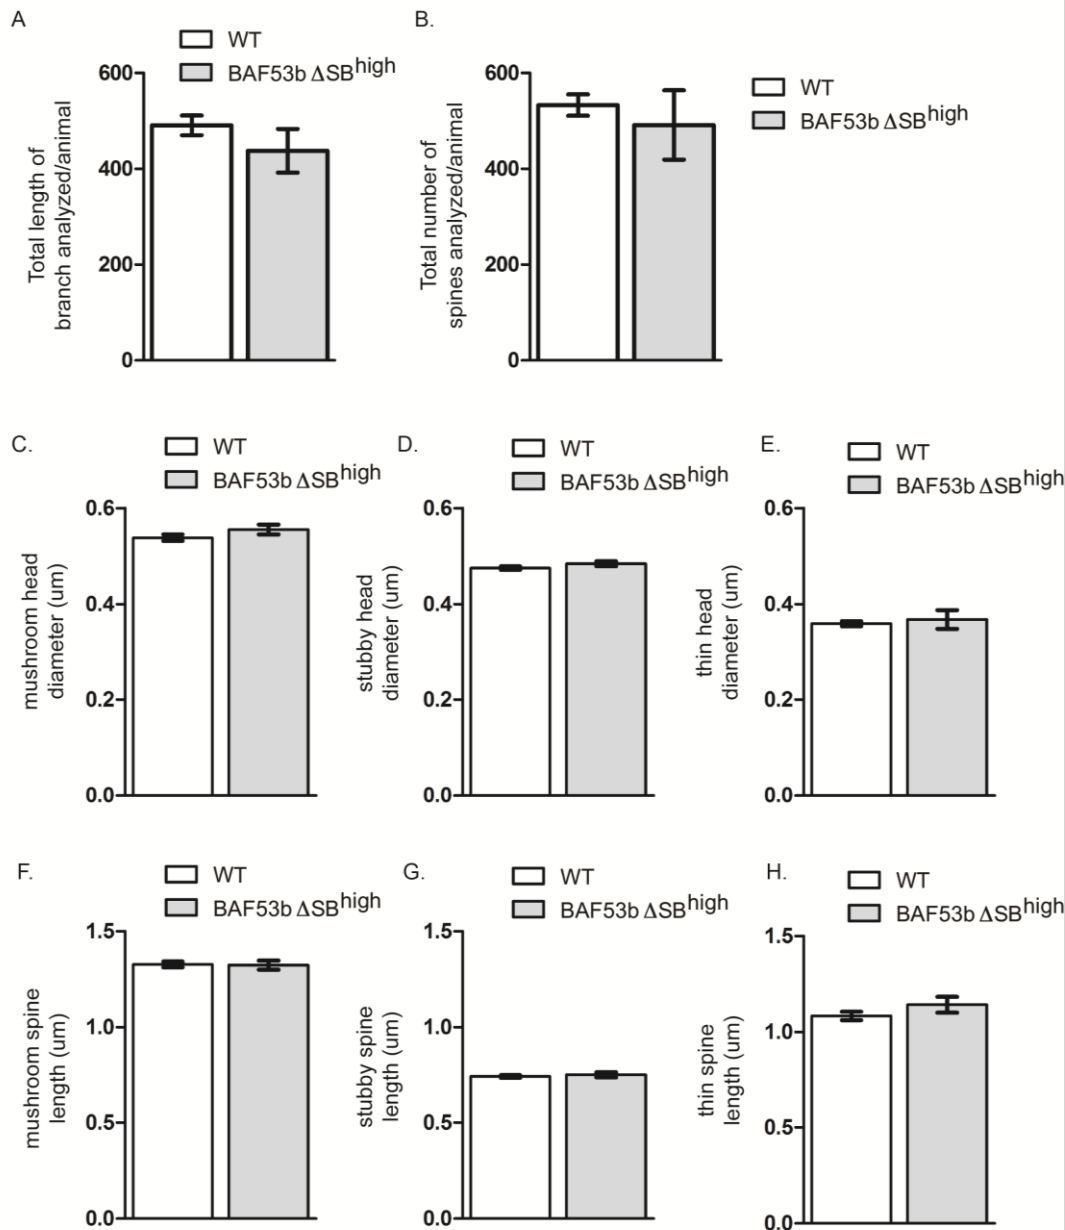

**Figure S3. Dendritic Spine measures in hippocampal CA1 are similar in wildtype and BAF53b $\Delta$ SB<sup>high</sup> mice**

(A) Total length of dendritic branches analyzed (n=7 animals per genotype, 9-11 branches per animal) in wildtype and BAF53b $\Delta$ SB<sup>high</sup> mice is equivalent (t(12)=1.06, p=0.31). (B) The total number of spines analyzed per animal for each genotype is also equivalent (Mann-Whitney U (12)=16.50, p=0.34). (C) Head diameter (microns) of spines categorized as mushroom was equivalent between the two genotypes (Mann-Whitney U (12)=15.00, p=0.26). (D) Head diameter (microns) of spines categorized as stubby was equivalent between the two genotypes (Mann-Whitney U (12)=16.00, p=0.32). (E) Head diameter (microns) of spines categorized as thin was equivalent between the two genotypes (Mann-Whitney U (12)=22.00, p=0.80). (F) Spine length (from dendritic branch to tip of spine head in microns) of spines categorized as mushroom was equivalent between the two genotypes (Mann-Whitney U (12)=21.00, p=0.71). (G) Spine length (from dendritic branch to tip of spine head in microns) of spines categorized as stubby was equivalent between the two genotypes (Mann-Whitney U (12)=20.00, p=0.62). (H) Spine length (from dendritic branch to tip of spine head in microns) of spines categorized as thin was equivalent between the two genotypes (Mann-Whitney U (12)=16.00, p=0.32). All graphs mean +/- SEM.

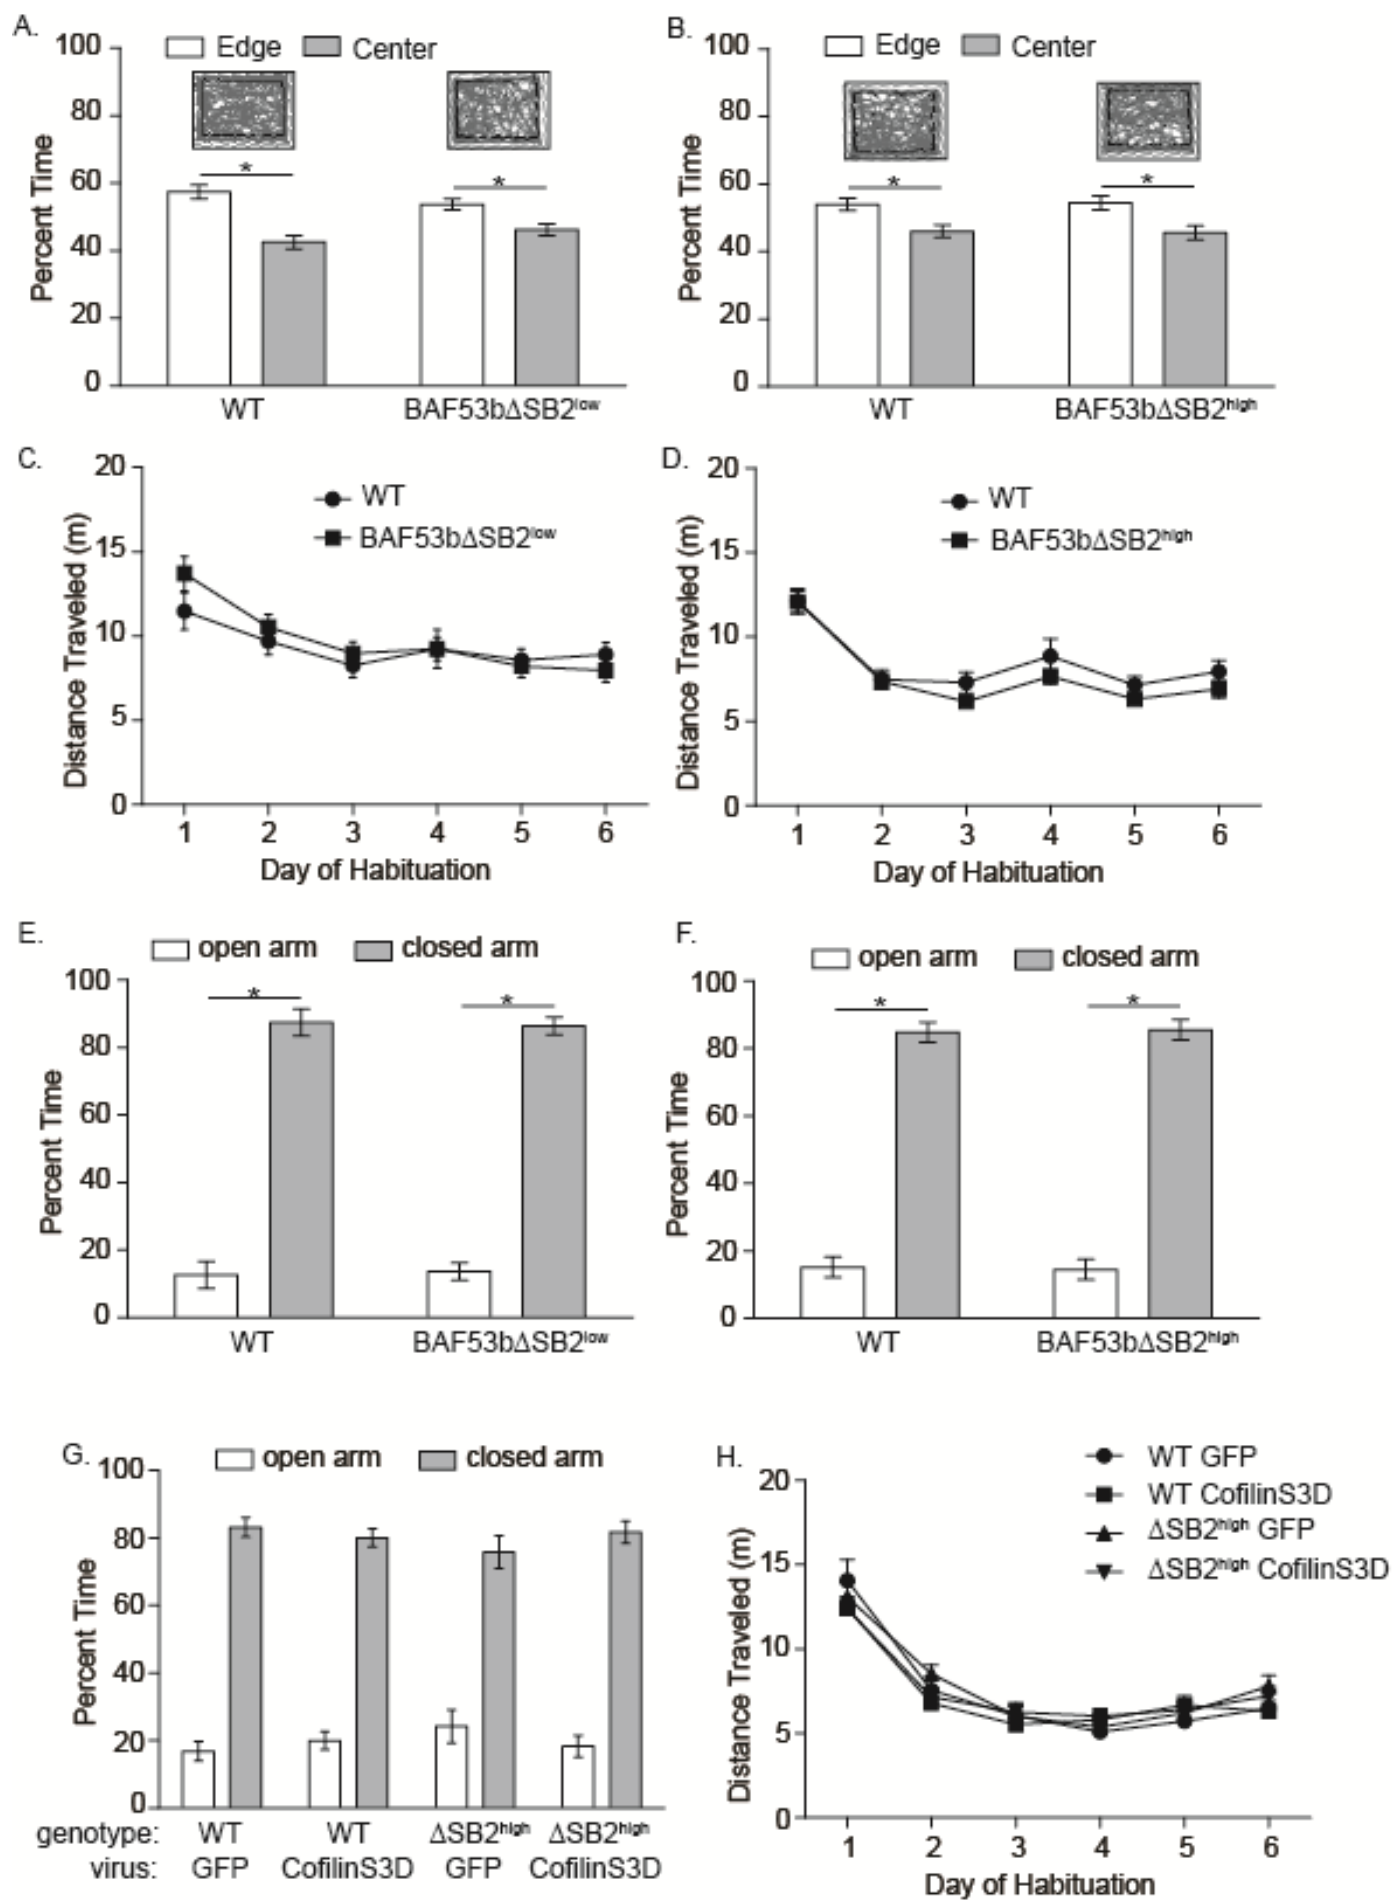

#### Figure S4. BAF53b $\Delta$ SB2 transgenic mice have normal anxiety and locomotion.

(A) BAF53b $\Delta$ SB2<sup>low</sup> (n=14) mice have normal exploration in open field (5min) as compared to wildtype littermates (n=11) (RM-ANOVA, main effect of location  $F_{1,23}=24.58$ ,  $p<0.0001$ , genotype  $F_{1,23}=32.86$ ,  $p<0.001$ , and no interaction  $F_{1,23}=1.29$ ,  $p=0.27$ ; bonferroni corrected t-test edge vs. center for WT  $t(11)=4.07$ ,  $p<0.001$ ; and BAF53b $\Delta$ SB2<sup>low</sup>  $t(13)=2.88$ ,  $p<0.05$ ). (B) BAF53b $\Delta$ SB2<sup>high</sup> (n=9) mice have normal exploration in open field (5min) as compared to wildtype littermates (n=13) (RM-ANOVA, main effect of location  $F_{1,40}=18.33$ ,  $p<0.0001$ , no effect of genotype  $F_{1,40}=0.00$ ,  $p=1.00$ , and no interaction  $F_{1,40}=0.06$ ,  $p=0.81$ ; bonferroni corrected t-test edge vs. center for WT  $t(12)=3.16$ ,  $p<0.01$ ; and BAF53b $\Delta$ SB2<sup>high</sup>  $t(8)=2.94$ ,  $p<0.05$ ). (C) BAF53b $\Delta$ SB2<sup>low</sup> (n=9) mice have normal habituation performance as assessed by total distance traveled across days of exposure to an environment (5min/day) as compared to wildtype littermates (n=12) (RM-ANOVA, main effect of day  $F_{5,95}=8.64$ ,  $p<0.0001$  but no effect of genotype  $F_{1,19}=0.46$ ,  $p=0.51$  or interaction  $F_{5,95}=1.02$ ,  $p=0.41$ ). (D) BAF53b $\Delta$ SB2<sup>high</sup> (n=22) mice have normal habituation performance as assessed by total distance traveled across days of exposure to an environment (5min/day) as compared to wildtype littermates (n=23) (RM-ANOVA, main effect of day  $F_{5,215}=34.62$ ,  $p<0.0001$  but no effect of genotype  $F_{1,43}=1.69$ ,  $p=0.20$  or interaction  $F_{5,215}=0.57$ ,  $p=0.72$ ). (E) BAF53b $\Delta$ SB2<sup>low</sup> (n=15) mice exhibit normal levels of anxiety as assessed by the percentage of time spent in the open arm of the elevated plus maze compared to wildtype littermates (n=10) (RM-ANOVA, main effect of arm  $F_{1,23}=264.8$ ,  $p<0.0001$  but no effect of genotype  $F_{1,23}=-5.58$ ,  $p=1.00$  or interaction  $F_{1,23}=0.05$ ,  $p=0.83$ ) with both genotypes showing a significant preference for the open compared to closed arm (bonferroni corrected t-test  $t(9)=10.65$ ,  $p<0.001$  and  $t(14)=12.69$ ,  $p<0.001$  wildtype and mutant respectively). (F) BAF53b $\Delta$ SB2<sup>high</sup> (n=9) mice exhibit normal levels of anxiety as assessed by the percentage of time spent in the open arm of the elevated plus maze compared to wildtype littermates (n=9) (RM-ANOVA, main effect of arm  $F_{1,16}=268.0$ ,  $p<0.0001$  but no effect of genotype  $F_{1,16}=2.64$ ,  $p=0.12$  or interaction  $F_{1,16}=0.03$ ,  $p=0.87$ ) with both genotypes showing a significant preference for the open compared to closed arm (bonferroni corrected t-test  $t(8)=11.46$ ,  $p<0.001$  and  $t(8)=11.69$ ,  $p<0.001$  wildtype and mutant respectively). (G) Viral over-expression in adult hippocampus in BAF53b $\Delta$ SB2<sup>high</sup> mice ( $\Delta$ SB2<sup>high</sup> GFP, n=13 or  $\Delta$ SB2<sup>high</sup> cofilinS3D, n=18) produces similar behavior on the elevated plus maze as wildtype littermates with either AAV-GFP (WT GFP, n=14) or AAV-cofilinS3D (WT cofilinS3D, n=16) expression in dorsal hippocampus. Two-way RM-ANOVA, main effect of arm  $F_{1,57}=306.43$ ,  $p<0.0001$  but no effect of genotype/virus  $F_{3,57}=0.00$ ,  $p=1.00$  or interaction  $F_{3,57}=0.77$ ,  $p=0.52$  with all genotype/virus combinations showing a significant preference for the open compared to closed arm. Bonferroni corrected t-test: WT GFP  $t(13)=9.29$ ,  $p<0.001$ ; WT cofilinS3D  $t(15)=8.99$ ,  $p<0.001$ ;  $\Delta$ SB2<sup>high</sup> GFP  $t(12)=6.97$ ,  $p<0.001$ ; and  $\Delta$ SB2<sup>high</sup> cofilinS3D  $t(17)=10.06$ ,  $p<0.001$ . (H) Viral over-expression in adult hippocampus in BAF53b $\Delta$ SB2<sup>high</sup> mice ( $\Delta$ SB2<sup>high</sup> GFP, n=13 or  $\Delta$ SB2<sup>high</sup> cofilinS3D, n=18) produces similar habituation across days of exposure to a context as in wildtype littermates with either AAV-GFP (WT GFP, n=14) or AAV-cofilinS3D (WT cofilinS3D, n=16) expression in dorsal hippocampus. Two-way RM-ANOVA, main effect of day  $F_{5,285}=102.36$ ,  $p<0.0001$  but no effect of genotype/virus  $F_{3,57}=0.31$ ,  $p=0.82$  or interaction  $F_{15,285}=1.14$ ,  $p=0.32$ . Mean  $\pm$  SEM.

| PDB ID | Chain ID | Source Organism                 | Res. | BAF53a Cov | BAF53a Ident | BAF53a Pos | BAF53b Cov | BAF53b Ident | BAF53b Pos | ΔSB2 Cov | ΔSB2 Ident | ΔSB2 Pos |
|--------|----------|---------------------------------|------|------------|--------------|------------|------------|--------------|------------|----------|------------|----------|
| 1C0F   | A        | <i>Dictyostelium Discoideum</i> | 2.40 | 98%        | 36%          | 54%        | 98%        | 37%          | 54%        | 98%      | 39%        | 55%      |
| 4EFH   | A        | <i>Acanthamoeba Castellani</i>  | 2.48 | 98%        | 37%          | 54%        | 98%        | 38%          | 55%        | 98%      | 38%        | 54%      |
| 3CHW   | A        | <i>Dictyostelium Discoideum</i> | 2.30 | 98%        | 36%          | 54%        | 98%        | 38%          | 55%        | 98%      | 38%        | 54%      |
| 1NLV   | A        | <i>Dictyostelium Discoideum</i> | 1.80 | 98%        | 36%          | 54%        | 98%        | 37%          | 55%        | 98%      | 38%        | 54%      |
| 3CI5   | A        | <i>Dictyostelium Discoideum</i> | 1.70 | 98%        | 36%          | 54%        | 98%        | 37%          | 55%        | 98%      | 38%        | 54%      |
| 1C0G   | A        | <i>Dictyostelium Discoideum</i> | 2.00 | 98%        | 36%          | 54%        | 98%        | 38%          | 55%        | 98%      | 38%        | 54%      |
| 1DEJ   | A        | <i>Dictyostelium Discoideum</i> | 2.40 | 98%        | 36%          | 54%        | 98%        | 38%          | 55%        | 98%      | 38%        | 54%      |
| 3MN5   | A        | <i>Oryctolagus Cuniculus</i>    | 1.50 | 97%        | 35%          | 53%        | 97%        | 37%          | 54%        | 97%      | 39%        | 55%      |
| 1KXP   | A        | <i>Oryctolagus Cuniculus</i>    | 2.10 | 97%        | 36%          | 53%        | 97%        | 38%          | 54%        | 97%      | 38%        | 54%      |
| 3A5L   | C        | <i>Dictyostelium Discoideum</i> | 2.40 | 98%        | 36%          | 54%        | 98%        | 37%          | 55%        | 98%      | 38%        | 54%      |
| 1IJJ   | A        | <i>Oryctolagus Cuniculus</i>    | 2.85 | 97%        | 36%          | 53%        | 97%        | 38%          | 54%        | 97%      | 38%        | 54%      |
| 4B1V   | A        | <i>Oryctolagus Cuniculus</i>    | 1.75 | 97%        | 36%          | 53%        | 97%        | 38%          | 54%        | 97%      | 38%        | 54%      |
| 3A5M   | C        | <i>Dictyostelium Discoideum</i> | 2.40 | 98%        | 36%          | 54%        | 98%        | 37%          | 55%        | 98%      | 38%        | 54%      |
| 1QZ5   | A        | <i>Oryctolagus Cuniculus</i>    | 1.45 | 97%        | 36%          | 53%        | 97%        | 38%          | 54%        | 97%      | 38%        | 54%      |
| 1EQY   | A        | <i>Oryctolagus Cuniculus</i>    | 2.30 | 97%        | 36%          | 53%        | 97%        | 38%          | 54%        | 97%      | 38%        | 54%      |
| 1YVN   | A        | <i>Saccharomyces Cerevisiae</i> | 2.10 | 97%        | 36%          | 54%        | 97%        | 37%          | 55%        | 97%      | 37%        | 54%      |
| 1D4X   | A        | <i>Caenorhabditis Elegans</i>   | 1.75 | 97%        | 36%          | 54%        | 97%        | 37%          | 54%        | 97%      | 38%        | 54%      |
| 4B1W   | B        | <i>Oryctolagus Cuniculus</i>    | 1.95 | 97%        | 35%          | 53%        | 97%        | 37%          | 54%        | 97%      | 38%        | 54%      |
| 2OAN   | A        | <i>Bos Taurus</i>               | 2.61 | 97%        | 35%          | 54%        | 97%        | 37%          | 54%        | 97%      | 37%        | 54%      |
| 3U4L   | A        | <i>Bos Taurus</i>               | 2.40 | 97%        | 35%          | 54%        | 97%        | 37%          | 54%        | 97%      | 37%        | 54%      |
| 1YAG   | A        | <i>Saccharomyces Cerevisiae</i> | 1.90 | 97%        | 36%          | 54%        | 97%        | 37%          | 55%        | 97%      | 37%        | 54%      |
| 1T44   | A        | <i>Oryctolagus Cuniculus</i>    | 2.00 | 96%        | 36%          | 53%        | 96%        | 38%          | 54%        | 96%      | 38%        | 54%      |
| 2BTF   | A        | <i>Bos Taurus</i>               | 2.55 | 97%        | 35%          | 53%        | 97%        | 37%          | 54%        | 97%      | 37%        | 53%      |
| 1LCU   | A        | <i>Oryctolagus Cuniculus</i>    | 3.50 | 96%        | 36%          | 54%        | 96%        | 36%          | 54%        | 96%      | 38%        | 54%      |
| 2GWJ   | A        | <i>Oryctolagus Cuniculus</i>    | 1.90 | 96%        | 36%          | 53%        | 96%        | 38%          | 54%        | 96%      | 38%        | 54%      |

|      |   |                                |      |     |     |     |     |     |     |     |     |     |
|------|---|--------------------------------|------|-----|-----|-----|-----|-----|-----|-----|-----|-----|
| 4CBU | A | <i>Plasmodium Falciparum</i>   | 1.30 | 99% | 34% | 54% | 99% | 34% | 54% | 99% | 34% | 53% |
| 3W3D | A | <i>Gallus Gallus</i>           | 1.80 | 97% | 35% | 53% | 97% | 37% | 54% | 97% | 37% | 53% |
| 4CBW | A | <i>Plasmodium Berghei</i>      | 2.50 | 98% | 34% | 54% | 98% | 35% | 55% | 98% | 36% | 54% |
| 1ATN | A | <i>Oryctolagus Cuniculus</i>   | 2.80 | 97% | 35% | 53% | 97% | 37% | 54% | 97% | 38% | 53% |
| 4JHD | B | <i>Drosophila Melanogaster</i> | 2.91 | 97% | 35% | 53% | 97% | 37% | 54% | 97% | 37% | 53% |
| 3M6G | A | <i>Oryctolagus Cuniculus</i>   | 2.00 | 96% | 35% | 53% | 96% | 37% | 54% | 96% | 38% | 54% |
| 2HF3 | A | <i>Drosophila Melanogaster</i> | 1.80 | 97% | 35% | 53% | 97% | 36% | 54% | 97% | 37% | 53% |
| 4JHD | A | <i>Drosophila Melanogaster</i> | 2.91 | 97% | 35% | 53% | 97% | 36% | 54% | 97% | 37% | 53% |
| 3EKS | A | <i>Drosophila Melanogaster</i> | 1.80 | 97% | 35% | 53% | 97% | 36% | 54% | 97% | 37% | 53% |
| 4M63 | C | <i>Drosophila Melanogaster</i> | 2.75 | 97% | 35% | 53% | 97% | 36% | 53% | 97% | 37% | 53% |
| 4CBX | A | <i>Plasmodium Berghei</i>      | 2.20 | 97% | 35% | 53% | 97% | 35% | 53% | 97% | 35% | 54% |

**Table S1. Description of the thirty-six Actin structures used as templates to predict BAF53a, BAF53b wildtype and BAF53b $\Delta$ SB2 3D structures.**

The PDB entry identifier, the chain identifier, the source organism, and the X-ray crystallography resolution are reported in the left-most four columns respectively. The percentage of amino acids in the protein sequence covered by the alignment (Cov), the percentage of identical amino acids (Ident) and positive substitutions (Pos) between the aligned sequences are shown for the blast alignments between the Actin protein sequences and BAF53a, BAF53b and the BAF53b $\Delta$ SB2 mutant construct protein sequences.
